# Supplementary material
Source: PubMed Central journal article supplement (PMC5528790)
Supplement: MOL2-9-1636-s004.pdf [file MOL2-9-1636-s004.pdf]

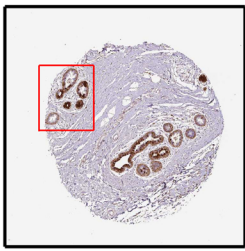

Breast  
Female, age 49  
Normal tissue  
Patient id: 4930

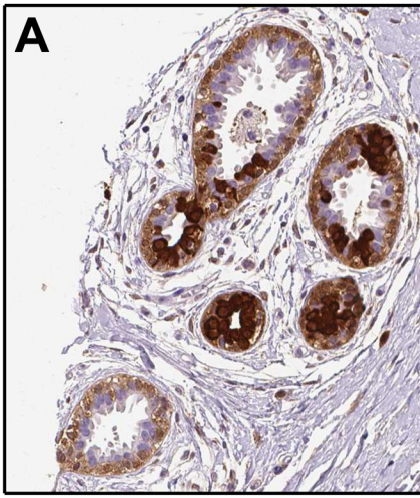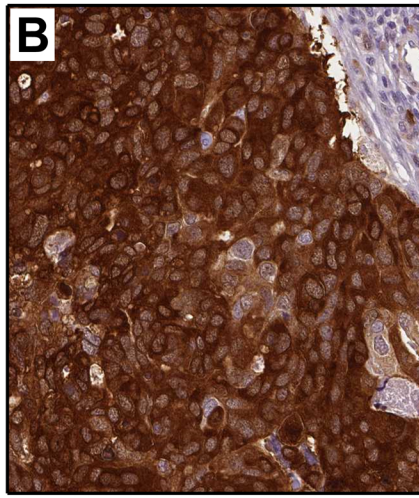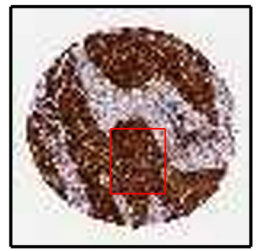

Breast cancer  
Female, age 83  
Duct carcinoma  
Patient id: 2160

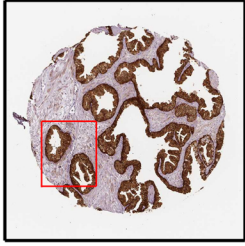

Prostate  
Male, age 61  
Normal tissue  
Patient id: 1984

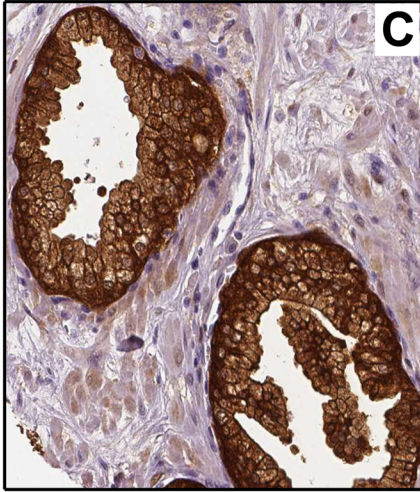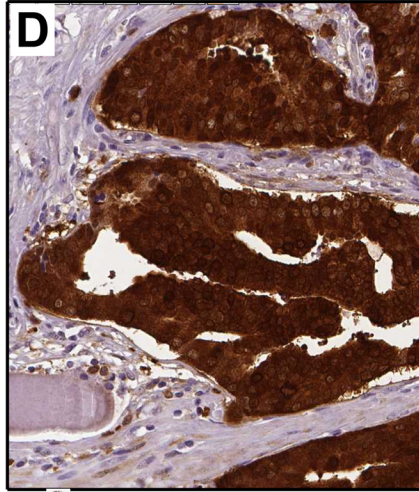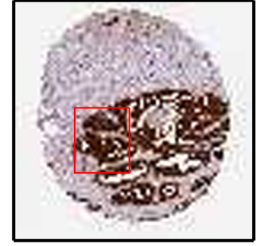

Prostate cancer  
Male, age 44  
Adenocarcinoma  
Patient id: 5415

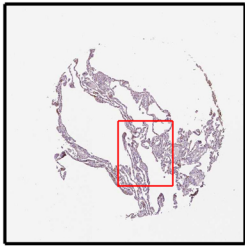

Lung  
Female, age 67  
Normal tissue  
Patient id: 2208

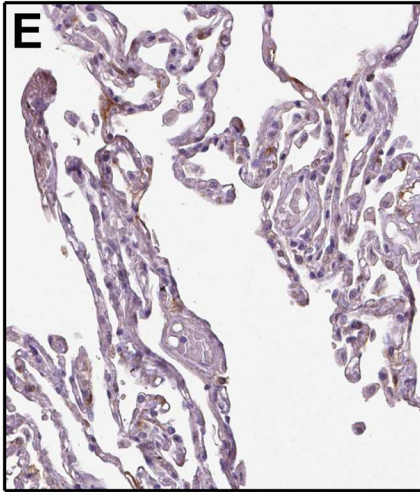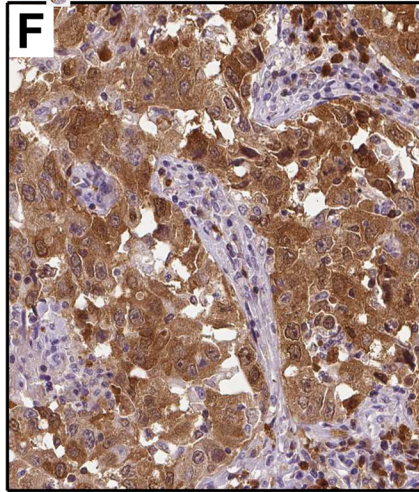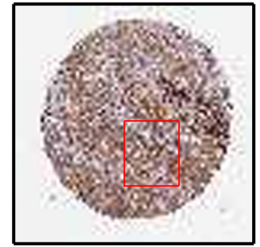

Lung cancer  
Male, age 73  
Adenocarcinoma  
Patient id: 1907

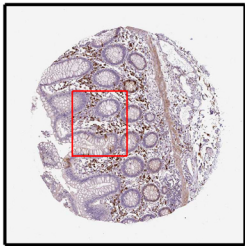

Colon  
Male, age 83  
Normal tissue  
Patient id: 1962

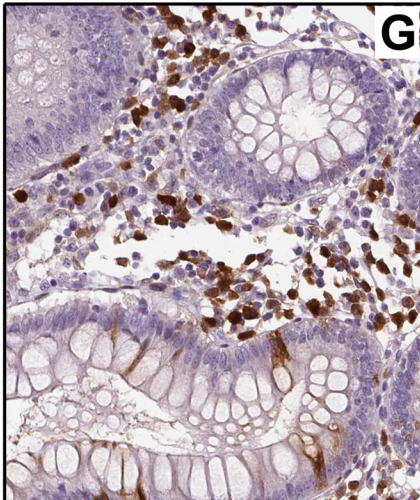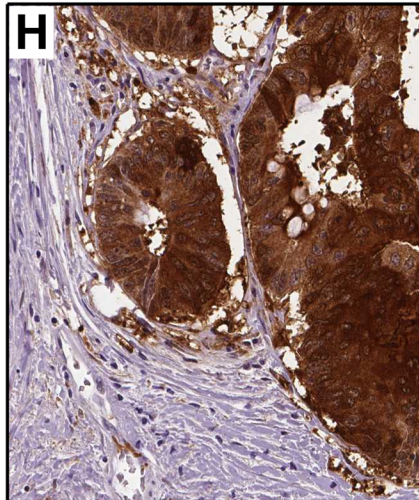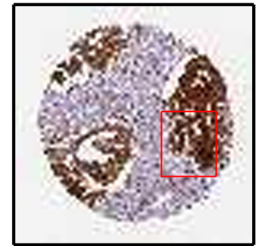

Colorectal cancer  
Male, age 59  
Adenocarcinoma  
Patient id: 795
