# Supplementary material
Source: PubMed Central journal article supplement (PMC5528790)

antibody 4A3-1D6

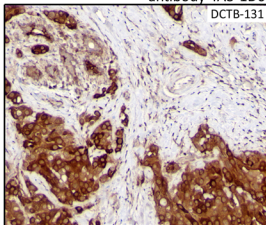

rec Phgdh+ antibody 4A3-1D6

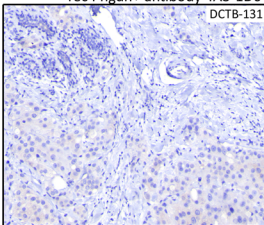

MDA-MB-453

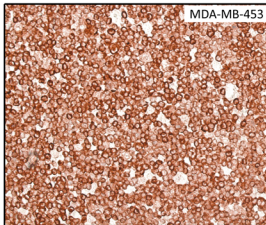

MDA-MB-453

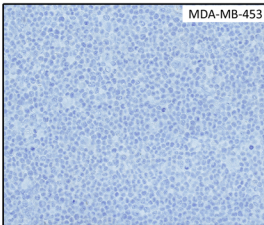

Supplement: MOL2-9-1636-s002.pdf [file MOL2-9-1636-s002.pdf]

O

ALL

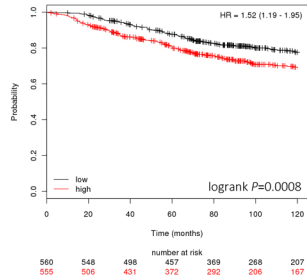

BASAL

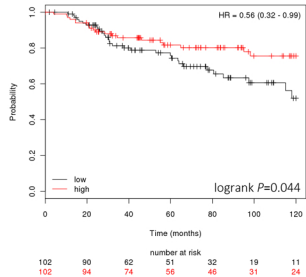

LUMINAL A

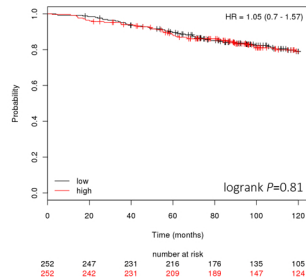

LUMINAL B

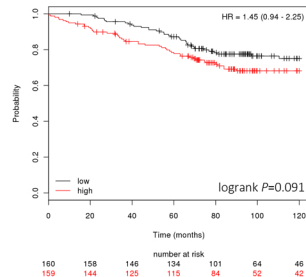

RFS

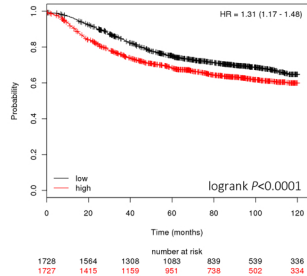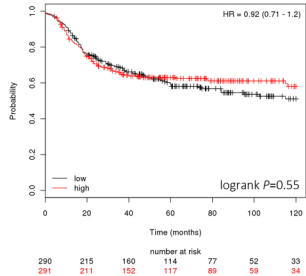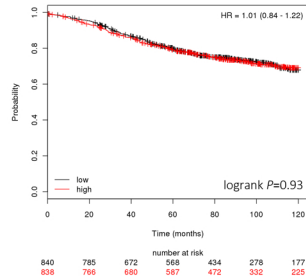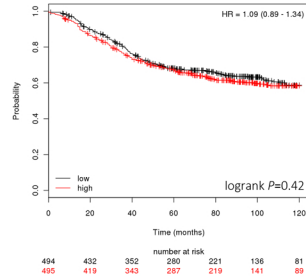

Supplement: MOL2-9-1636-s003.pdf [file MOL2-9-1636-s003.pdf]
